# Supplementary material for: Coregulation of ribosomal RNA with hundreds of genes contributes to phenotypic variation
Source: HighWire-hosted journal article supplement (doi:10.1101/gr.229716.117), 2018-08-30
Supplement: Supplemental_Dataset1.xlsx [file Supplemental_Dataset1.xlsx]

## Sheet: Sheet1
Copy number estimated for 282panel population with several types of tandem duplicates in maize genome
#taxa	CN45S	CN5S	CN5.8S	CN18S	CN25S	CentO	knob180	knobTR1
4226	4188.77	3399.76	3960.39	4798.15	3878.73	62486.4	485527	14031.2
4722	2374.59	1590.81	2480.96	2692.08	2260.89	36980.6	661292	9665.41
33-16	4113.03	4487.9	5980.23	4481.63	4053.38	57568.5	550998	7298.01
38-11Goodman-Buckler	3914.6	2058.67	4111.12	4299.69	3725.35	65939.9	501829	24837.6
A188	3439.77	1485.96	3601.33	3598.45	3302.73	68057.7	474674	8072.48
A214NGoodman-Buckler	3590.39	3037.17	3920.28	3952.57	3484.2	74364.1	1.01638e+06	12837.9
A239	3367.63	1356.55	3515.76	3843.85	3147.36	60060.5	723429	11768.8
A441-5	4395.09	1640.83	7079.24	4376.23	4246.61	73189	411105	5368.41
A556	4968.79	3302.69	6239.98	5727.18	4712.84	92220.5	799231	6871.24
A6	4555.93	3346.35	7309.69	4357.77	4447.16	97557.8	2.21389e+06	46927.8
A619	3380.09	3059.29	4242	3880.84	3199.37	91756.5	838837	14574
A632	3543.48	3254.79	3879	4400.5	3190.24	77959	534110	12657.1
A634	5200.17	3070.51	7698.69	5409.29	5192.21	108504	848821	12007.7
A635	4038.67	3168.73	4270.58	4859.03	3907.69	79886.6	646852	27446.3
A641	3758.15	2133.71	3796.49	4350.84	3510.44	39410.1	792377	29054
A654	2513.51	2355.92	2686.49	2797.28	2396.73	64313.4	526985	20849.3
A659	2408.28	2791.85	2777.44	2585.61	2321.31	71285	522678	12472
A661	5050.54	2436.3	5344.98	5140.19	4917.35	43963	570207	18627.7
A679	3541.49	2396.74	4886.74	3829.05	3337.34	42577	382281	9803.06
A680	3109.31	2350.99	3445.73	3667.26	3002.32	52028.8	435573	8940.21
A682	5501.58	4095.29	7253.41	6304.92	5370.47	105196	418345	7659.5
Ab28A	4307.43	4951.61	5712.3	4836.17	4148.96	68166.9	787106	25261.3
B10	2461.46	5573.82	2151.92	2946.61	2334.97	58494.7	855752	11015.9
B103	2278.59	4327.32	1627.67	2958.91	2157.57	113760	264483	5041.81
B105	3473.17	2358.7	4389.53	4044.68	3228.66	64647.5	468010	5164.88
B109	4267.25	2385.27	5473.7	4810.42	4066.85	65661.4	720114	12803.1
B14A	5055.47	3804.91	6132.39	5790.35	5001.34	109587	910807	16648.4
B164	3637.22	1746.95	4822.63	4065.11	3440.09	77383.8	386991	20033.2
B2	5608.58	4092.11	7817.86	5805.13	5457.78	103289	830316	8285.79
B37	4692.99	4039.57	6716.62	4700.92	4571.38	104962	440830	11539.1
B46	2927.47	6953.41	3468.99	3401.82	2823.05	98368.3	858138	8063.72
B52	4093.17	2912.29	5878.94	4387.16	3922.85	74589.5	926451	36750.8
B57	3225.76	4056.3	4374.13	3648.71	3042.09	60127.9	437467	18590.7
B64	3930.33	2549.1	4827.62	4713.23	3546.41	112474	942829	17964.1
B68	4574.03	2864.48	6301.95	5018.41	4362.77	101923	838876	12435.7
B73	3190.28	2412.27	4368.03	3606.96	3013.72	46787.6	423448	8665.58
B73Htrhm	3386.72	1840.71	3471.69	3819.91	3293.03	40909.6	418505	9136.1
B75	5009.16	2899.29	6525.11	5764.68	4733.7	92561.3	745359	34582.9
B76	3492.17	3680.59	4914.73	3831.24	3267.32	84795.9	412849	9663.3
B77	6092.33	2964.77	7565.7	6996.07	5868.5	74337.6	407120	22159.2
B79	3144.11	4297.48	3662.7	3268.39	3028.55	55253	345285	7399.18
B84	3153.14	1845.98	3440.78	3658.85	2945.93	55783.6	448540	13842.4
B97	4092.81	1602.47	3538.78	4930.44	3846.53	47622	561418	10164.2
C103	7332.48	4294.03	10787.9	7925.84	7348.96	118579	153100	6261.91
C123	3784.76	2052.78	4316.9	4090.54	3604.81	65384.7	18544.1	7344.87
C49A	4349.6	2159.29	4893.29	4821.13	4067.4	53860.7	248829	19999.7
CH701-30	3107.23	2396.4	3973.85	3509.72	3024.01	78439.7	649881	7516.06
CH9	3776.01	2601.53	3927.97	4280.81	3535.31	46297.1	375206	19669.4
CI187-2	8920.13	4350.22	10695.1	8608.42	8834.38	74243	732269	2939.03
CI21E	3697.13	2723.18	4791.4	3761.83	3643.81	52993	800754	8476.16
CI28AGoodman-Buckler	6134.38	3205.87	8486.01	6900.14	6066.78	123879	983928	22455.4
CI31A	3244.45	4978.54	3735.82	3470.58	3082.27	35524.2	875956	36428.1
CI3A	5408.12	1949.91	6744.42	5251.3	5284.16	78386.3	876667	21890.7
CI64	3577	2860.98	4379.88	3810.42	3488.67	42800.1	667593	37150.8
CI66	5683.23	2429.77	6921.4	5693.37	5473.42	52275	1.07291e+06	34686.6
Ci7Goodman-Buckler	6903.48	2014.13	9841.12	7722.27	6740.25	90716.4	579767	9558.98
Ci91BGoodman-Buckler	4272.4	4588.06	5552.51	4848.16	4170.28	100566	930273	5797.57
CM105	3487.64	4546.01	3745.89	4042.32	3342.96	48716	272843	12258.9
CM37	3844.44	1754.62	4524.36	4089.63	3653.51	59030.7	539498	29026.6
CM7	4514.63	2753.93	6834.9	4748.23	4303.09	91942.5	650268	24921.3
CML10	2792.91	2638.08	4236.59	2800.5	2692.22	49918	1.00186e+06	47628.5
CML103	5883.15	5289.2	6710.64	6557.08	5765.43	70672	342375	48720.3
CML108	5186.98	3259.93	5911.53	5244.11	5065.04	68606	1.12847e+06	16911
CML11	2490.79	2696.59	4081.99	2543.98	2388.34	57422	1.05124e+06	46312.4
CML14	5822.74	4557.76	9188.93	5627.49	5661.72	74158.7	2.73325e+06	54905.2
CML154Q	6416.87	7090.92	11604	6200.84	6215.89	87482	1.73163e+06	34597.9
CML157Q	3085.11	5428.21	4630.7	3182.86	2974.95	63937.8	915992	27029.2
CML158Q	3409.08	4093.36	5293.96	3482.25	3266.86	124470	1.36738e+06	75223
CML218	3631.96	2894.01	5810.35	3578.38	3520.92	86124.4	1.45124e+06	51349.7
CML220	4597.89	3070.66	7470.07	4528.03	4458.73	74217	1.66279e+06	65348.1
CML228	6794.81	1973.76	8737.08	7624.7	6633.81	81577.1	1.01036e+06	61758
CML238	9331.12	4629.93	15826.9	7883.95	9419.35	112069	1.63431e+06	68994.8
CML247	5133	2011.07	6532.86	5882.31	4904.25	83031.6	1.17839e+06	49366.2
CML254	4989.54	4688.59	8792.05	4517.33	4977.75	84734.9	1.1711e+06	43471.3
CML258	3998.85	3715.65	6905.43	3800.15	3907.98	114657	1.71723e+06	11013.8
CML261	6887.38	5164.61	11174	7229.08	6497.2	72336.8	2.02328e+06	74764.5
CML264	4457.39	4482.6	6714.87	4679.8	4256	57857.6	1.12948e+06	20270.5
CML277	5966.7	2218.13	8583.43	6082.79	5753.25	88472.4	916965	36821.6
CML281	7231.99	3026.85	11233.2	7218.47	6978.51	69030.2	1.18319e+06	45532.1
CML287	4390.58	3703.39	7492.72	3934.64	4365.39	82307.3	1.43877e+06	69504.7
CML311	1974.49	3354.73	2786.11	2196.58	1884.93	63996.6	1.22837e+06	75456.8
CML314	7675.54	1776.41	12610.4	7303.58	7546.35	86107.5	1.68636e+06	70359.7
CML321	5327.41	4795.58	8673.13	5121.01	5233.23	84269.7	1.49554e+06	49111.7
CML323	7176.63	7260.37	11590.7	6610.49	7149.2	116065	1.80214e+06	39028
CML328	2265.38	2986.5	3971.08	2244.7	2196.95	67520.5	1.04283e+06	50831.9
CML331	3198.33	3305.13	4357.48	3526	3076.63	77118	1.24386e+06	39028.2
CML332	2987.79	4074.39	3679.37	3476.4	2818.7	73875.2	1.18057e+06	78325.6
CML333	2812.23	5538.18	2896.32	3340.93	2692.22	95844.6	1.0608e+06	49610.9
CML38	15086.4	3379.71	25822.8	13446.6	15107.9	111667	2.91043e+06	203790
CML45	4019.42	4184.61	4266.54	4028.17	3923.66	56845	1.01394e+06	44080.3
CML5	6747.58	2737.83	10776.1	6640.3	6571.28	107298	1.83393e+06	16320.5
CML52	2808.51	2719.11	2888.88	3175.51	2726.29	64841.1	1.22404e+06	59408.5
CML61	3460.84	4109.36	5184.53	3636.84	3299.41	67285.9	1.47162e+06	26276
CML77	3007.88	1506.44	4461.08	3214.37	2843.77	79048.9	1.1711e+06	53695.4
CML91	2853.93	1006.58	2793.99	3039.97	2738.12	50671.2	854922	15008.6
CML92	3124.98	4406.43	3248.74	3225.09	3025.15	60607.9	1.13562e+06	60120.9
CMV3	1862.7	4808.31	2407.86	2168.32	1790.06	51552.4	486619	26282.9
CO106	4373.18	3334.19	4705.65	4371.91	4253.43	63583.9	454732	21857.2
CO125	6915.3	2322.66	7020.89	7208.2	6689.35	81165.2	920979	8349.21
CO255	2663.01	3625	3833.22	2806.85	2616.58	65111.1	366565	21098.7
D940Y	5914.25	4366.6	7391.71	6359.8	5891.88	50411.9	500505	7808.08
DE	2762.8	2650.34	3474.46	2894.66	2703.28	45448.8	523724	13124.8
DE1	2655.65	2098.88	3091.77	2965.47	2504.09	54927.2	319017	21929.9
EP1	5005.6	1173.8	8009.9	4799.85	4907.99	87574.6	439762	32465.2
F2834T	5018.36	4625.18	7416.14	5015.38	4856.8	98344.9	1.16341e+06	12393.2
F6	5191.31	4042.76	7542.84	5549.7	4928.16	96661.6	586359	4489.68
F7	3587.92	3814.31	4710.15	3893.75	3415.17	62016.4	350015	10060.3
GA209	5628.47	2860.78	9150.67	5334.64	5563.35	65321.7	1.17942e+06	25220.5
GT112	1953.33	3134.01	2617.08	2130.06	1890.32	86293.2	475236	20294.3
H105W	6092.55	5058.4	7738.38	6874.25	6041.45	85945.7	683405	10230.9
H49	3008.13	1616.96	2740.9	3642.83	2887.73	116039	873373	24238.3
H84	3813.71	3801.99	4236.66	4607.21	3568.82	124331	409643	22086.9
H91	4003.3	3442.06	5259.76	4531.71	3837.36	83255.8	411160	8632.18
H95	4164.36	2334.02	4579.56	4781.34	3922.68	65405.7	706634	21601.1
H99	6120.99	3223.33	8166.46	6711.68	5973.08	125538	923817	34613.1
Hi27Goodman-Buckler	2979.36	6511.66	4215.11	3268.47	2811.28	113405	1.48439e+06	32295.1
HP301	2583.63	2375.95	3490.57	2929.47	2462.94	58138.4	279322	4463.32
I137TN	2431.31	1847.34	3810.28	2409.66	2360.64	83354.5	487891	7706.44
i1677a	4197.08	3721.47	5450.14	3969.24	4165.68	80160.9	108758	5212.39
I205	12385.1	4039.74	12210.8	14621.7	11263.7	86677.1	266118	20185.9
I29	3801.08	2659.48	6392.98	3720.45	3700.69	69578.5	201706	18575.2
IA2132Goodman-Buckler	2316.56	2168.17	3311.76	2522.38	2185.55	48213.8	94342.8	21442.2
Ia5125	3933.96	3604.45	4484.26	4414.57	3726.08	48437.5	296411	8184.95
IDS69	3008.79	2597.55	4244.24	3238.33	2829.79	52773.7	285077	5001.29
IDS91	2794.84	2441.57	3736.89	3148.37	2594.7	58990.1	402534	7975.31
Il101	8179.22	2654.61	11756.5	9004.23	7811.22	86818.5	115034	5709.02
Il14H	3395.13	2584.25	4212.42	3933.22	3218.22	85024.9	117539	6082.4
ILLHy	2798.99	2560.12	3207.76	3123.27	2619.95	56069.3	600919	9591.48
K148	4447.95	3252.87	6900.19	4601.36	4244.08	62818.5	861176	23845.8
K4	3896.75	2447.65	4154.09	3940.04	3795.88	75229.4	314251	18733.9
K55	4540.23	1980.56	6594.45	5002.45	4319.64	72087.6	830441	5585.72
K64	3012.22	2929.01	4052.93	3290.06	2868.84	44594.3	944100	41602.6
Ki11	4997.83	3225.68	7200.89	5202.66	4777.07	57905.5	1.01215e+06	81891.7
Ki14	4026.08	4662.42	4803.8	4665.06	3857.2	71852.2	1.03752e+06	45999.9
Ki2021	4391.87	3694.9	5832.11	4802.58	4225.72	63723.3	457332	23469.3
Ki21	2284.23	5786.05	2311.44	2684.48	2176.55	94654.8	540063	42073.7
Ki43	5133.32	4477.93	5240.09	5241.27	4995.41	57683.7	1.1478e+06	41182.3
Ki44	4675.52	4958.76	7189.64	4936.21	4464.12	107148	1.18717e+06	31309.9
Ky21	4884.76	3317.6	6094.1	5715.1	4520.43	93083.9	534661	26351.8
KY226	5479.25	3596.38	7350.58	5936.68	5221.43	94718	1.05908e+06	8956.52
KY228	3488	2156.36	3492.96	3688.53	3356.99	51918.7	787418	25580.1
L317	5791.45	1833.63	8250.35	6157.65	5577.92	90832.1	336750	9659.11
L578	6271.26	3022.18	8241.17	7056.86	6227.34	128446	1.27832e+06	25582.3
M14	5282.44	3320.91	6235.34	5836.06	5049.81	45405.5	1.06286e+06	15162.4
M162W	2502.59	3342.56	2996.9	2961.01	2386.91	89584	548890	18815.5
M37W	5568.46	3750.01	6966.54	6368.69	5154.11	47633.8	744547	8459.43
MEF156-55-2	1061.22	1813.92	992.873	1189.02	1003.59	39209.2	390533	20055.6
Mo17	3493.46	3222.67	4366.42	4122.46	3265.03	66052.8	172317	7589.05
Mo18W	4545	6571.46	7875.49	4234.85	4491.16	110048	1.20544e+06	34382.3
MO1W	2496.57	3071.95	3105.69	2844.12	2387.44	78824.8	800156	22346.4
Mo24W	6636.37	4245.75	8384.68	6702.96	6430.29	99590.3	1.88104e+06	20524.9
Mo45	5501.77	2890.61	7507.96	6022.27	5274.87	85464	779800	6687.61
Mo46	5385.31	2421.73	7296.99	5799.36	5306.04	93547.6	640798	34004.5
Mo47	9834.31	1977.39	14246.4	10242.9	9620.05	98387.4	1.10043e+06	10192.5
MoG	4319.6	2244.96	4369.11	4461.13	4196.29	56043.2	243866	17344.5
Mp339	4381.21	1699.73	4700.39	4445.22	4249.9	39322.9	660661	30005.2
MS1334	2679.54	2385.25	2982.43	2550.81	2663.75	49684.8	221495	10250.6
MS153	4793.18	2473.24	5504.07	5566.85	4666.07	78753.1	590868	7556.48
Ms71	3140.52	4527.43	2969.52	3682.04	3011.05	61268.4	795452	5929.75
Mt42	2775.76	1709.51	2971.76	2840.06	2682.05	60676.9	530090	21550.6
N192	3260.51	1822.24	4432.4	3727.02	3047.67	46865	427445	7612.85
N28Ht	4156.78	3386.47	5602.89	4544.51	4002.33	77198.3	872005	26036
N6	17347.1	5005.78	18085.7	19855.6	16503.5	88533.1	895828	15296.3
NC222	3211.6	3503.93	5301.54	3229.98	3107.84	74882.9	523421	25848.3
NC230	4135.94	4185.6	4466.17	4133.61	4039.54	49838.5	646693	5203.68
NC232	4306.04	2109.28	5262.75	4996.05	4125.46	67734.8	1.00275e+06	29665.6
NC236	3939.63	5555.96	6352.77	3854.34	3831.46	72663.2	915751	16293.1
NC238	10038.7	3790.52	15048.8	10106.4	9859.96	92557.6	1.23448e+06	24596.9
NC250	3276.52	2552.77	3704.36	3787.54	3035.06	64935.1	504323	5243.04
NC258	3568.19	1841.52	3966.73	4127.4	3337.32	59047.6	361705	10014.8
NC260	2330.77	2574.17	2235.28	2749.56	2157.98	57969.1	286196	7505.13
NC262	4896.55	1981.32	6912.2	5307.57	4802.18	86570.2	432752	7011.29
NC264	5418.31	3553.9	8533.27	5488.07	5238.99	84002	821234	38282.1
NC290A	6557.34	4051.51	8601.31	7236.72	6306.48	111468	595924	6894.03
NC294	4313.36	3307.41	6029.78	4813.99	4096.87	109388	748846	8363.02
NC296	6035.26	5423.98	7138.3	6190.66	5835.69	88552.3	1.07607e+06	54106.8
NC300	2541.8	2745.15	4173.87	2530.53	2460.11	91631.9	1.81295e+06	78476.6
NC302	4214.63	3694.27	4984.01	4411.61	4042.27	77697.3	1.45621e+06	67791.4
NC304	3968.33	3974.77	5053.37	4475.38	3875.53	102967	1.15505e+06	44321.4
NC306	4422.44	2866.31	6389.37	4748.92	4185.99	87421.7	583074	9810.83
NC310	3649.17	2463.54	4236.59	4183.66	3563.56	67555.2	546519	7623.81
NC314	3978.58	3049.31	5880.36	4386.91	3859.56	94963	656132	9801.55
NC318	4935.65	3355.5	7599.12	5050.03	4773.78	79085.9	856052	38330.4
NC320	4520.75	3174.58	7116.75	4389.77	4445.73	83835.3	539796	22314.2
NC324	3204.9	2347.18	3701.84	3768.2	3079.82	83279.2	527406	6897.36
NC326	3155.64	2133.96	4202.88	3554.38	2930.53	41910.9	414640	9772.31
NC328	3032.98	2279.68	3629.44	3622.08	2781.98	57977.9	453750	9245.27
NC33	5098.77	5768.05	7771.67	5231.12	4905.51	77987.5	688442	33132.4
NC336	4916.47	4082.43	5567.02	5141.42	4734.59	59231.2	1.04538e+06	65327.9
NC338	3142.2	4076.3	3471.75	3166.94	3053.16	66637.7	1.19639e+06	60355.7
NC340	4171.05	2916.13	6803.77	4182.03	4024.53	65864.8	1.62911e+06	89028.5
NC342	4002.76	2801	5036.77	4544.69	3889.39	75342.3	369437	5084.96
NC346	3931.98	3650.62	4639.49	3970.19	3806.54	75556.8	827655	65777.1
NC348	6994.94	2353.16	7740.51	6911.01	6817	76340.1	1.12992e+06	43794.6
NC350	5699.26	7405.09	7200.14	6613.73	5327.72	102079	1.11573e+06	76464
NC352	4966.95	3681.05	5959	4978.98	4810.03	57584.7	1.02582e+06	70442.6
NC354	4473.15	3336.95	6787.79	4571.37	4322.99	90453.4	1.32886e+06	86020.6
NC356	6395.52	3608.96	7392.12	6488.18	6234.72	55498.5	1.01529e+06	58150.2
NC358	6637.71	5498.58	8233.67	7628.66	6387.29	111419	1.21432e+06	54725.3
NC360	4686.31	1559.02	5230.84	4573.1	4610.61	65534	1.12235e+06	62853
NC362	7266.52	2690.48	8885.54	7244.14	7112.01	100557	943968	28832.3
NC364	5161.25	2635.33	6197.99	5113.04	5063.06	67933.4	687403	6009.26
NC366	2729.63	2632.93	2737.88	2793.95	2650.3	55225.8	1.00167e+06	34143.5
NC368	2385.99	2783.65	3160.83	2693.9	2322.8	101439	599864	9430.82
ND246	4371.43	2602.17	5528.73	4920.86	4204.97	75229.4	490312	21808.2
Oh40B	4540.09	3942.58	4941.3	5597.63	4215.56	77434.5	474416	20493.1
Oh43	3010.93	2853.01	3430.19	3451.83	2856.56	66684.5	723796	16547.2
Oh43E	2364.16	3333.68	2513.07	2870.73	2223.95	80777.5	833484	16275.9
Oh603	4236.78	3112.31	5904.12	4625.55	4275.59	108606	815943	11473.1
OH7B	4570.07	2974.31	6076.96	5107.63	4271.16	61545.3	544157	24828
Os420	3577.5	3754.95	4025.69	3843.87	3425.57	54175	980068	14881.1
P39Goodman-Buckler	3705.73	2231.62	4771.21	4270.45	3511.97	73138.8	281450	20672.4
Pa762	5688.83	2625.42	6407.83	6492.44	5403.03	60364.6	839972	9890.7
Pa875	2495.85	2796.8	3225.17	2776.79	2374.48	82686.2	938911	31745.4
Pa880	6281.97	1721.95	8643.54	6850.24	6107.7	76873.4	714119	14343
Pa91	3301.63	4419.58	3945.46	3852.44	3178.33	151235	957298	37105.2
R168	4356.09	8208.08	4770.39	5199.47	4136.78	110342	862841	8391.86
R177	4247.78	2347.73	4521.95	4887.94	3996.67	73093.8	699631	17128.5
R229	2113.68	2266.47	2379.39	2548.34	1981.51	48064.8	431967	10552.3
R4	2642.89	2708.62	2727.39	2988.18	2547.65	62991.6	855951	12246.9
SA24	3326.41	1752.19	3617.14	3605.06	3202.96	46319.4	651680	25995.5
SC213R	6041.88	2486.27	8182.98	6795.08	5917.78	106940	247054	17447.6
SC357	2716.92	2862.28	2669.21	2854.47	2628.19	45958.4	395285	22295.6
SC55	12145.3	5048.68	20051.7	11639.8	11880.3	120884	823926	48137.3
SD40	4349.85	1374.58	4927.91	4957.91	4180.32	46115.9	557757	24105.4
Sg1533	3305.91	2519.41	3804.38	3614.36	3235.89	49504.2	174342	3997.44
Sg18	2337.77	2215.33	2966.57	2696.13	2244	62892.3	299486	4594.15
T232	2023.44	4039.18	2622.6	2287	1945.07	74245.8	624339	8532.46
T234	2727.89	1978.44	2914.37	2768.53	2653.74	43254	588175	7900.6
T8	3028.36	3393.74	3315.03	3516.12	2837.94	44757.3	327891	19901.8
Tx303	3275.1	1453.16	4713.41	3499.96	3085.6	66111.3	940525	34337.4
Tx601	6666.23	2996.76	8667.86	7677.07	6433.05	125053	1.38651e+06	36370.3
Tzi10	4260.52	2622.79	7022.35	4244.56	4116.36	69188.2	1.0472e+06	84306
Tzi11	2264.39	4185.45	3524.13	2226.23	2201.07	86900.1	2.0782e+06	61270.2
Tzi16	2558.34	2206.19	2999.27	2645.3	2462.18	46309.4	721915	32434.9
Tzi18	11084	7703.31	13588	10257.6	11075	106863	2.89895e+06	51853.7
Tzi25	4175.47	2162.38	4847.4	4365.49	3996.71	83837.6	1.10389e+06	38128.4
Tzi8	4718.37	2335.84	6713.39	5104.59	4584.54	72908.6	1.232e+06	76337
Tzi9	7006.66	3229.32	11640.5	6975.19	6735.28	76049.4	1.35268e+06	67495.3
U267Y	3654.14	2269.67	3813.99	3798.72	3525.61	58681.1	430733	17887.4
VA102	5149.45	3675.63	7478.43	5343.04	4928.4	43183.3	291944	8104.57
Va17	3129.32	3605.02	3371.74	3743.72	2981.06	111848	607047	22800.9
Va22	4629.25	2660.7	5079.4	5049.69	4599.38	85207.1	462013	11485
Va26	2293.05	2664.61	2760.84	2718.32	2163.72	66384.2	798846	31019.3
Va35	4316.03	3621.07	6114.45	4751.89	4163.36	76004.3	294715	18665.5
Va59	4036.28	2672.8	4545.2	4635.55	3790.85	39802.1	208826	9835.25
Va85	5039.6	2684.55	5092.08	5765.21	4710.3	54478.1	461253	15652.5
Va99	4025.22	3929.5	4270.27	4912.08	3884.09	104580	599775	22522.6
VaW6	4608.07	3867.37	5709.02	5213.72	4416.95	73932.8	777504	40268.9
W117Ht	3891.02	2045.14	3609.96	4623.7	3625.01	46630.3	519055	14314.3
W153R	2268.42	1946.91	2410.6	2598.78	2147.74	80007.7	505752	19232.1
W182B	5869.51	5069.97	6148.26	6924.09	5664.36	106790	285858	9684.88
W22	3440.6	3466.96	4190.01	3786.14	3284.67	90932.6	775881	12719.2
W64A	1914.48	2689.17	1699.76	2325.23	1789.5	56977	667825	32417.9
Wf9	2209.69	2986.3	2526.98	2578.39	2151.7	96516	884675	29648.9
Yu796	4865.66	2953.7	5284.46	5415.17	4562.48	52154.1	488600	6083.13
