# Supplementary material for: Coregulation of ribosomal RNA with hundreds of genes contributes to phenotypic variation
Source: HighWire-hosted journal article supplement (doi:10.1101/gr.229716.117), 2018-08-30
Supplement: Supplemental_Dataset2.xlsx [file Supplemental_Dataset2.xlsx]

## Sheet: Sheet1
Reads per million estimated within 282panel for 7 tissues
taxa	Groot	Gshoot	Kernel	L3Base	L3Tip	LMAD	LMAN
4226	21383.1	13960.2	11980.9	10769.9	6741.5	18836.7	14759.7
4722	NA	NA	3744.6	10733.4	7042.3	NA	17244.7
33-16	24569.3	21964.9	5853.9	24487.5	19232.9	22277.2	12643.5
14185	NA	NA	7293.8	19095.4	15462.1	NA	16072
A188	NA	18972	13063.4	17565.5	16897.9	19603.1	24330.4
A214N	15714.3	16684.2	NA	15496.4	10874.8	15685.4	15405.1
A239	18648.2	13317.1	5972.8	17356.5	17722.5	NA	20438.9
A272	19463.7	17426.2	15137.1	NA	NA	14069.6	15176.7
A441-5	20286.2	11372.9	9667.9	9043.8	8751.7	20832.1	17763.1
A554	31429.5	20280.2	NA	41198.3	NA	15211.8	22585.5
A556	12436.6	7487.7	10661.6	19780.4	13357.5	19024.5	23261.4
A6	20943.3	23329.2	3357.5	24399.8	11809.1	14984.9	23735.3
A619	32825.9	26566	4727.6	22394.8	NA	17159.1	20651.8
A632	21850.5	22289.1	4851.2	9642.3	16995.3	15226.6	17076.5
A634	27489.1	24507	11182.7	29992	NA	NA	15801.8
A635	20002.3	22207.3	6579	25739.7	NA	NA	18465.9
A641	10559	26198.3	7828.7	30651.3	NA	14991.7	23295.2
A654	13535.6	27770.3	10384.1	21015.3	18080.6	14766.6	21436.2
A659	29665	NA	11495.6	10868	7677.9	15295.2	16352.6
A661	18087.6	23879.6	11350.3	20160	17080.6	14367.4	27061.7
A679	21523.7	22057.1	11938.8	18904.9	12405	18761.2	23819.3
A680	9616	22544.1	7718.8	35666.9	11992.3	NA	16760.2
A682	27291.4	24933.6	11043.6	21394.3	15237.7	14977.7	14902.7
Ab28A	19070.9	26210.9	14123.6	19016.9	14559.9	11648.7	14584.7
B10	NA	NA	17624.9	NA	17889.5	NA	7661.3
B103	22911	21218.4	NA	16092.4	11863.1	17166.1	25619.9
B104	22066.7	31943.9	11655.9	NA	NA	NA	17930.2
B105	22557.3	28967.8	9612.1	16125.6	14192.5	NA	20611
B109	18934.2	20951.9	NA	32940.9	15628.9	NA	15790.6
B115	NA	NA	NA	NA	NA	NA	NA
B14A	20827.5	19690.5	14509.9	NA	17734	NA	18480
B164	28739.7	27591.9	4440	41648.1	13623.5	NA	16423.8
B2	NA	18680	14675.6	28181.9	11039.2	NA	15382.1
B37	23127.1	24008.1	5268.5	13195.2	10738.7	NA	16072.2
B46	NA	24855.2	NA	12306	8971	23827.2	16116.2
B52	11825.4	27028.8	NA	12235.1	9400.6	24218.8	17399
B57	24587.6	31511.3	5032	30983.9	13095.1	NA	16180.6
B64	22940.9	27958.3	2538.2	39050.8	11240.4	19374.4	20579.6
B68	20161.6	14311.1	6070.6	29607.9	11735.3	NA	19599.7
B73	21807.5	29454.8	9603.3	11487	13107.2	19885.4	21195.4
B73-10	NA	28229.2	NA	NA	NA	NA	NA
B73Htrhm	21167.9	28940.6	5326.4	40023.8	18550.3	NA	18220.4
B75	30153.1	23708.6	10709	14827.3	7405.6	NA	22964.8
B76	32631.9	6498.5	NA	16813.1	17843.6	16878.2	17654.1
B77	17527.4	22349.5	10502.7	13108.2	4815.9	25655.8	16936.2
B79	36872.7	20687.1	2052	33677.5	12607.1	NA	17798.6
B84	19163.5	16736.1	12057	10781.2	8346.7	19213.5	23182.7
B97	13616.4	26386.4	NA	46266.1	12272.8	NA	16747.6
C103	21356.4	33104.1	5636.6	16144.8	8780.1	NA	17934
C123	12191.7	24953.1	7576.7	17049.8	11183.3	13497.8	23659.3
C49A	11390.2	5610.2	4732.1	36591.1	14502.3	16341.3	22193.8
CH701-30	21990.8	21228.1	17391.8	11367.9	15508.1	13221.6	20216.1
CH9	9383	23947.9	5643.7	33128.2	13633.7	NA	16273
CI187-2	NA	23328.1	12214.1	10484.7	6631.3	NA	22383.4
CI21E	NA	31916.4	4278.2	27995.4	12181.8	27905.5	22467.5
CI28A	18235.3	29947.8	5887.8	20359.1	11804.4	30911.9	20806.3
CI31A	27394.9	19569.9	10549.7	14660.3	9086.9	21332	12511
CI3A	9271.1	26213.7	5080.3	13903.7	15105	NA	15890.5
CI64	19919.9	21645.3	NA	25392.1	21079.8	22871.5	24456.2
CI66	9220.2	27743.8	4855.1	13202.3	7694.1	15802.8	13378.1
CI7	22868.3	22549.2	6509.6	33655	10606.3	22344.2	1226.5
CI90C	19022.5	20363.9	10795	13008.8	9134.5	35183.3	18519.6
CI91B	20595.7	17778.1	5179.1	15414.7	11066.5	30390.3	20216.5
CM105	23967.2	21347.9	6259.4	30675	14574.2	17269.5	20176.9
CM174	NA	NA	NA	NA	NA	NA	NA
CM37	22753.6	15669	3467	12993.9	7608.2	19094	21317.8
CM7	NA	28343.2	5999.9	11961	7272.1	17890.7	25298.3
CML10	24341.4	23882.2	NA	NA	NA	25131.6	9783.9
CML103	23561.1	16020.4	10990.5	9859.6	5990.3	22447.8	11793.1
CML108	11330.5	25474.6	NA	26263	15828	25732.8	14864.9
CML11	NA	23385.7	5016.8	10629.1	7132.5	14887.4	19139.9
CML133	20202.8	19740.3	NA	NA	NA	NA	NA
CML14	24597.7	25452.9	NA	15836.6	7850.3	NA	NA
CML154Q	10726.7	13236.5	2875.3	9766.4	8611.3	25119.4	18730.6
CML157Q	26219.5	28256.1	7104.5	16773.4	13645	13997.8	14766.3
CML158Q	23180.9	21258.8	NA	20390.6	14038.4	13112.2	16269
CML192	27682.2	21713.1	NA	NA	NA	NA	NA
CML202	16684.6	19741.6	NA	NA	NA	NA	NA
CML206	22178	21091.5	NA	18147.9	14696.8	10932.4	19867.6
CML218	22031.2	20990.6	5694.3	17888.9	13239.3	17689.7	17371.4
CML220	13421.5	19464.1	4057.6	25385.1	13053.8	13968	12728
CML228	14634.6	22266.1	4179	9520.5	10104	11850.6	20697.7
CML238	NA	24528.4	NA	16556.8	10924.5	15366.2	18311.6
CML247	18573.8	20156.1	NA	28141.6	11125.7	NA	NA
CML254	19584.8	18614.4	NA	13927.1	9287.5	NA	NA
CML258	12340.4	23145.7	NA	12884.1	17179.2	NA	NA
CML261	22246.9	17278	NA	22199.1	16000	14789.4	19034.7
CML264	10571.1	26673.9	NA	NA	NA	NA	NA
CML277	24296	18159.7	NA	8570.6	9803.6	14580.9	18726.1
CML281	NA	27882.2	NA	15332.6	8219.4	NA	NA
CML287	NA	28753.9	NA	NA	NA	NA	NA
CML311	NA	40085.5	NA	9454.4	8778.8	NA	NA
CML314	16939.5	18214.1	2812.9	15582	11065.8	17360.9	20072.9
CML321	26490.2	15658.8	NA	6762.8	7919.7	NA	NA
CML322	NA	34739.7	8694.8	29566.3	16026.7	12342.2	16552.6
CML323	10733.5	31919.4	5245	12384.9	7625.3	15836.9	15392
CML328	29485	29066.5	NA	29197.9	12291.1	NA	17930.4
CML330	12191.6	NA	8906.5	12192.2	7356	14790.5	12107.6
CML331	24113.1	27996.7	NA	8931	9657.1	12879.2	20351.2
CML332	22565.7	26723.2	NA	8794.6	10045	NA	NA
CML333	16761.5	14930.7	8996.5	24735.8	11346.1	16866	14765.3
CML341	9791	17666.3	NA	13932.6	9070.8	10840.3	20607.8
CML38	29549.1	24141.1	3813.2	12620.5	10280.9	20513.2	17386.7
CML411	23657.3	21242.8	6905.7	19960.3	12819.6	15839	20529.4
CML418	19441.4	8946.8	2978.9	17882.4	9923.4	NA	19796
CML45	25091.9	23511.9	NA	8784.7	7184.5	NA	NA
CML479	NA	24803.7	NA	NA	NA	NA	NA
CML5	NA	31307.5	NA	11770.1	10265.7	NA	NA
CML504	15363.2	19064.9	NA	8578.4	8246.3	13134.5	17459
CML505	NA	NA	10715.5	13814.3	8277.5	23281.6	17061.4
CML511	28141.4	17091.9	NA	9512.5	8711.7	10326.4	23961.8
CML52	NA	26857.2	NA	NA	NA	NA	NA
CML61	NA	21995.6	NA	15103.3	7936.2	NA	NA
CML69	25514	22920.1	12508.7	10992	9766	13457.5	20680.6
CML77	28856.2	19437.8	9360.2	14885.5	8974.7	27549.8	22517.1
CML84	18651.5	20771.8	4533.9	12907.9	7690.4	14236.6	19530.2
CML85	22387.7	26091.4	2506	25324.4	10815.9	16344.6	22610.5
CML91	20959	21793.9	8150.3	14615.3	8227.8	17387.5	15711.6
CML92	23092.3	23323.1	6432.9	21272.3	13606.5	NA	17411.4
CML96	18735.8	17927.2	11127.1	23070.2	11857.2	15117.9	22691.2
CMV3	19849.5	22203.6	13268.1	NA	17120.8	19132	18906.7
CO106	24816.9	17171	10158.8	36233.6	11770.7	22582.3	25210.9
CO125	14290.5	19323	8163	38953.5	13493.9	17914	21893
CO255	18541.5	17484.8	10749.8	40148.6	14032.5	13032.2	16811.5
D940Y	19900.4	14208.8	8156.4	29954.6	12650.7	15797.6	19953.9
DE_3	NA	NA	NA	NA	NA	NA	NA
DE1	25779.2	23608.7	11421.3	7634.7	9530.2	NA	19650.2
DE2	NA	NA	NA	NA	NA	NA	NA
DE3	NA	NA	NA	NA	NA	NA	NA
DE811	21145.8	23485.5	10284	16255	8032.2	20888.2	21321
E2558W	13319.5	17889.8	4579.5	NA	18061.8	18072.3	19175.8
EP1	16934.1	20443.9	5412.3	22549.8	11349.4	19121.9	31337.5
F2834T	19802.6	25063.6	13702.5	14028.7	14289.4	19637.3	15614.4
F6	20909.1	23236.4	4460.9	16499.2	14972	15328.1	16697.9
F7	18322.3	17772.8	7997.5	31133.1	14139	19789.2	18898.2
GA209	19015.6	24508.2	6205.2	14219.3	9251.3	13497.8	16961.9
GT112	12105.6	21460.4	10655.3	6902.9	6278.8	7297.3	19511.7
H105W	26778.2	25792.2	5931.1	37551.9	14497.8	NA	18762
H49	13597.8	19279.4	7419.1	23234.4	14540.5	NA	19316.1
H84	20452.5	29455.3	12061.1	NA	14445.2	NA	18651.1
H91	17417.8	19921	13297.2	19788.6	18289	15028.4	20935.2
H95	16994.2	23772.9	12308.5	10781.3	14231.8	NA	16567.2
H99	22325	21104.8	4877.4	31124.6	13373.6	16617.4	22434.3
Hi27	12181.5	15830.1	3069.4	11065.2	11763	14640.4	14276.5
HP301	19263.4	22327.2	11918.6	28791.4	11570.2	19038.1	17321.9
I137TN	17073.1	26341.8	3516.2	10944.8	11125.7	22326.9	18612.6
I205	10816.8	16703.1	8437.1	13175.1	10169.5	NA	17548.4
I29	14485.7	20129.3	14993.5	9929.1	6688	16575.2	26550.6
IA2132	10063.7	12646.5	8230.7	12361.7	9641	16136.9	20553
Ia5125	14033	19522	NA	11274.8	11731.5	16546.1	19845.4
IDS28	9272	19291.5	8335.5	33868.9	11213.9	NA	17463.6
IDS69	9397.9	24029.4	6424.4	16386.2	13308.2	15987.2	19596.4
IDS91	10876	18773.4	12550.8	9775	6956.5	NA	15839.3
Il101T	18922.9	21834	4244	17119.8	16319.5	NA	18598.2
Il14H	17088.5	21147.8	4964.2	13303	6682.9	19022.6	25493.2
Il677a	11014.7	26875.2	7101.5	16890.2	8545.7	28947.7	16529.1
Ill.Hy	20062.9	17547.3	NA	34832.5	13307.7	NA	NA
K148	25755.7	19350.6	10608.7	18720.7	12012.5	22843.1	16022.6
K4	4680.8	18577.2	10431.3	42023.9	11477.1	31072.5	19770.6
K55	23830.1	26171	10384.8	24971.8	12386.7	18479.4	19728.1
K64	21252.6	18237.3	6236	20556.5	13484.4	13894.8	9877.2
Ki11	29185.9	28302.5	NA	25859	7985	12735.4	16470.4
Ki14	30569.7	20135.7	NA	NA	NA	14149.7	19790.8
KI2007	NA	NA	NA	NA	NA	NA	NA
Ki21	25057.2	15374.2	12840.8	17589	8896.9	24531.8	23565.4
Ki3	28049	29241.9	7734.3	21486.9	14487.8	14751.3	18767.6
Ki43	14622.6	11102.3	4845.2	15033.2	4925.3	NA	NA
Ki44	11167.2	17690.9	8907.8	20165.4	16094.8	13992	22342.6
KUI2021	15915.1	29084.8	NA	NA	NA	NA	NA
Ky21	13931.5	3308.3	6118.3	20095.3	10652.9	27658	10589.5
Ky226	18509	26501.1	14688.6	14535.7	8509.7	19737.7	20142
Ky228	19954.6	22714	10525.1	27600.9	13518.1	18259.1	10400.1
L317	27907.8	21100.3	11321.1	15589.2	8546	21580.6	16705.5
L578	17597.2	21041.9	9792.2	16844.1	11378.7	14185.5	16385.5
M14	13697	24023.5	6352.9	9837.4	7745.3	NA	17638
M162W	13820.4	NA	4689.5	26792.1	16033.3	24523.6	19193.4
M37W	21499.6	18024.6	9204.6	13039.7	11198.9	16476.9	12180
MEF156-55-2	13723.6	23236	3818.7	9628.6	12401.8	20402.6	18917.5
Mo.G	28574.8	13898.2	4557.8	16871.8	12177.3	NA	NA
Mo17	16324.1	30989.6	15316.2	8877.7	11304.1	NA	16736
Mo18W	10635.9	21680.5	12798.3	38792.1	12383.2	14437.9	14801.5
Mo1W	26936	27481.6	7380.2	15191.7	7948.2	18990	14045.9
Mo44	12523.8	19416.1	7295.4	11546.8	7501.5	NA	15804.3
Mo45	27473.9	19180.2	12769.9	16086.6	9797.7	21867.1	19955.3
Mo46	17491	18940.6	NA	22356.9	17586.6	NA	19769.7
Mo47	5874.8	9324.6	11713.9	16443.5	9125.4	16936.7	15954.2
Mp339	28029.9	22433.3	6907.8	26451	11018	21124.1	17481
MR01	8668.5	NA	NA	NA	NA	NA	NA
MR02	12307.3	30237.7	NA	NA	NA	NA	NA
MR03	NA	NA	NA	NA	NA	NA	NA
MR06	2884.7	NA	NA	NA	NA	NA	NA
MR08	18775.6	31952	NA	NA	NA	NA	NA
MR09	28242.2	19295	NA	NA	NA	NA	NA
MR10	16782.8	18001.4	NA	NA	NA	NA	NA
MR11	28920.7	18870.9	NA	NA	NA	NA	NA
MR12	27153.3	20816.8	NA	NA	NA	NA	NA
MR18	13054.2	NA	NA	NA	NA	NA	NA
MR19	8865.6	NA	6752.3	10005.5	7010.9	17852.1	19772.3
MR20	15020.2	22906.5	12486.5	14957.2	12664	27215	23204.6
MR21	8098.4	NA	NA	NA	NA	NA	NA
MR26	NA	NA	NA	NA	NA	NA	NA
MS1334	22882.5	18935.5	6074	18166.1	15906.4	17931.6	23958.3
MS153	13150.7	25837.3	7055.9	18470.8	14016.7	15380.3	16839.5
MS71	11588.9	NA	11409.7	NA	NA	15383.3	19375.6
Mt42	26306.2	19513.7	10928.2	17327.2	16501.9	18061.9	18598.7
N192	22119.2	29705.4	16487.5	25339.3	14182.3	20932.7	24016.7
N28Ht	18152.2	26056.9	16168	11488.7	9992.5	19081.8	8847
N6	22979.8	22521	NA	22598.9	12938.2	NA	19043.7
NC222	25765.4	15810	6447.4	12088.8	10800.5	21821.4	15337.9
NC230	19029.9	15829.9	8707	21479.8	17092.8	29137.2	15097.7
NC232	18849.8	21280.9	12192.9	14406.3	7168.8	2914.6	15478.6
NC236	29838.5	32171.8	12535	19419.5	8911.6	22144.6	23428
NC238	19067.4	18528.9	5508.2	11254.4	10032.3	15052.9	14424.8
NC250	17136.5	28417.9	10313.5	15280.9	14746.1	20312.4	18803.8
NC258	33874.7	21909	10876.3	15306.6	9701.8	24308.1	16373.6
NC260	20288.7	21074.1	11397.3	20242.7	12851.1	NA	14325.9
NC262	35433.1	39814.5	8453	14772	9385.3	30890.5	16258
NC264	20784.6	20689.3	3468.9	NA	15968.5	20379.1	19445.3
NC290A	21880.1	23712.1	7274.2	18206.9	8989	21164.4	17184.9
NC294	16836.5	25436.6	5050.2	22459.9	10202	24844	22565.1
NC296	22196.2	29237.7	9130.8	25070.5	18954	13671	13772.6
NC296A	13587.4	26074.9	7855.3	20040.9	12684.2	16320.8	13603.6
NC300	18667.7	24831.2	4374.3	11506.1	11566.8	11047.7	16290.8
NC302	26159.8	18171.2	9905.5	10839.4	9128.2	16812.7	15637.1
NC304	23404	20924.9	10347.1	16951.8	12037	12389.9	15398.3
NC306	27243.6	22358.7	8911.1	26308.4	14313.3	21055.5	19470
NC310	16785.8	20626.6	6394.2	12754.6	6813.5	NA	16786
NC314	20259.4	28098.2	9913.8	13811.9	16460.1	23431	12447.8
NC318	18354.1	20118.7	12331.3	17320.8	18911.5	27642.5	12527.4
NC320	13185.5	19141.8	6456.7	13352.7	8671.4	18969	12587.1
NC324	24311.1	20676.5	15842.1	38722	13702.7	20967.4	16196
NC326	23258.2	27404.8	12734	36453.8	12139.5	27720	24173.7
NC328	17105.1	17804.1	6392.5	36213	11064.2	19651	18628.7
NC33	11493.6	23860.8	4881.6	19209.2	10701	14720.1	16133.9
NC336	20635.2	19943.2	11297.9	18774.7	15319.4	18338.2	11915.4
NC338	13705	24587.3	13447.8	13449.6	14063.5	15285.1	17607.3
NC340	8476	29918.5	5433.7	21095	12893.4	20686.2	19423.4
NC342	3466.9	20709.2	NA	29590.2	12419.4	28593.3	23608.8
NC344	22402.5	24180.5	10270	17611.4	15713.6	29179.8	16237
NC346	27887	26132.3	5081.2	19336.4	18061.8	22044.9	16674.9
NC348	29063	25624.6	4107.6	22151	16540.1	21492.6	15576.3
NC350	14964.9	19149.3	NA	18117.1	7512.9	21131.4	18947.4
NC352	26544.6	26491.4	2468.5	19332.1	14493.1	13603.7	14564
NC354	24289.4	32164.4	5832.2	9436.1	7904.5	24446.8	18879.5
NC356	17631.9	25563.3	13955.6	21609.9	16162.4	17941.7	14813.6
NC358	11653.5	25584.5	6947.2	15796.5	7000.2	21601.9	21278.6
NC360	23192	20683.1	6175.5	13287.5	11017.1	21805.4	18417.2
NC362	27090	23486.8	7486.8	17625.9	11283	NA	15085.9
NC364	14610.8	20807.6	17493.9	19364.1	7519.3	NA	17670.2
NC366	24646.4	22454.7	11537.7	14346.1	14783	14479.1	15184.3
NC368	18613.8	19858.4	8099.7	14449.1	17510.4	17631.2	9088.4
ND246	28733.1	20487.3	5062.4	40076.9	14451	21992.4	28918.1
Oh40B	17446.4	19445.5	10013.1	14286.9	8188.2	NA	15687.3
Oh43	26501.8	17745.9	7535.4	NA	16312.4	3207.6	21325.5
Oh43E	13622.7	21517.6	7740.9	22857	11640.3	NA	17301.1
Oh603	18846.7	29280.2	4747.6	22391.5	22134.5	22785.2	15936.2
Oh7B	11590.4	30365.8	6315.2	29936.9	13744.3	18126.1	11803.1
Os420	16647.7	25730.5	NA	8998.5	16978.9	10355.7	13636
P39	NA	NA	9360.6	22113.7	15708.1	18628.9	15438.3
Pa762	29826.5	24267.5	NA	17928.8	14552.5	NA	18283.5
Pa875	27964.2	16566.1	11873.8	NA	NA	17285.7	24772.6
Pa880	16491.3	17891	11800.2	46245	12572.7	20453.4	9908.5
Pa91	20267.4	17828.4	7068.5	17749	11215.2	24941	19660.1
R109B	NA	NA	NA	NA	NA	NA	NA
R168	20477.9	27213.1	7666.3	36808.4	13197.8	14841.5	16344.9
R177	12172.8	26463.8	12546.6	17675	7972.4	NA	20506
R229	27737.5	2916.6	9261	20059.4	16609.2	23496.1	21996.2
R4	22330.3	24881.7	13061.1	32471.7	14408.1	19233.7	16970.6
SA24	14664.9	21549.8	7759.9	40365.3	12244.5	20379.4	19966
SC213R	20192	21834.1	NA	15984.3	9581.5	15560.2	15617.6
SC357	26544.9	27109.2	NA	NA	NA	22912.7	19985.5
SC55	13211.2	14633	11049.7	41723.2	14081.3	15141.4	14314.8
SD40	20624.2	15857.1	13282.2	14392.5	12414.7	NA	18703.8
SD44	11742.2	23945.9	4477.7	25646	13700.3	15447	10696.1
Sg1533	17056.4	19402.2	8028	18061.6	13828.5	20317.7	12037.2
SG18	9082.5	25375	4469	14658.8	12504.3	23815.6	15532.6
T232	20643.6	29177.5	6933	11800.7	8994.7	18124.8	13502
T234	12943.7	23446.1	10460.8	16225.1	11168.7	27634.9	18442.1
T8	14983.1	16827.8	6536.8	36094.5	12710.1	17101.9	18410.9
Tx303	11912.8	NA	NA	35001.1	14060.5	15209.1	15927.9
Tx601	24257.2	18280.1	NA	NA	NA	NA	NA
Tzi10	20409.7	19220.3	NA	NA	NA	NA	NA
Tzi11	22223.3	22169.6	7460.2	34425.6	12348.9	12651.3	18873.9
Tzi16	12101.5	27868.5	2949.2	22814.7	18050.5	12984.5	18156.7
Tzi18	18145.6	32005.3	11453.4	10084.6	10143.8	14537.5	8941.5
Tzi25	11089.2	17111.9	9051.9	15873.6	10761.1	14372.3	17879.1
Tzi9	22738.8	NA	4616.1	16888.7	13188.6	14981.5	15742.9
U267Y	25831.1	24077.6	11718.1	9781.5	10491.8	11015.3	11584.8
Va102	23173.3	21459.2	3138.8	8894.8	8101.1	NA	19469.7
Va14	24178.7	25991.7	11072.2	23163.6	12470.9	20214	14441.6
Va17	31293.9	26571.5	9512	16240.2	12949.4	17449.3	17918.5
Va22	21756	19562	5272.8	9173.4	7330.1	22256.5	15124
Va26	9881.1	20911.5	14040.5	21567.5	14073.4	NA	17789.4
Va35	19565.8	NA	10816.4	31895.9	13182.4	NA	17086.4
Va59	9173.8	20189.8	7741.6	18377.3	10899.7	17935.4	15859.1
Va85	14129.1	19985.2	5980.3	18353.2	14337.8	20740.1	17402
Va99	19015.7	12740.3	4560.9	27339.6	18465.2	NA	15988.7
VaW6	28807.8	20005.9	2767.7	33436	13106.4	NA	15179.3
W117HT	14278.3	15502.7	2749.9	26271.7	15591.8	20567.1	24339.3
W153R	21858.7	15521.6	6085.2	16264.7	8529.1	14521.3	19943.5
W182B	26083.1	23319.9	11376	13922.2	14172.8	23899.6	NA
W22	25547.4	22623.2	8743.2	1123	9051.1	NA	18488.6
W22R-rstd	NA	NA	7695.9	NA	NA	16748.2	19082.1
W64A	14125.9	24871.6	14305.6	16233.2	21411.1	NA	17632.9
Wf9	16481.8	19021	4697.3	29729.5	12711.4	NA	21812.3
Yu796NS	13617.7	25405	5281.8	20551.3	15357.3	NA	16213
Mo24W	NA	NA	NA	19870.5	19025.1	NA	NA
WD	NA	NA	NA	NA	NA	NA	NA
NC298	NA	NA	NA	15696.6	8604.6	NA	NA
